# Supplementary material for: Growth promotion and mycorrhizal colonization of Argan (Argania spinosa (L.) Skeels) inoculated with the edible desert truffle Tirmania nivea (Desf.) Trappe
Source: PeerJ. 2022 Aug 17;10:e13769. doi: 10.7717/peerj.13769 (PMC9392452; doi:10.7717/peerj.13769)
Supplement: Supplemental Information 3 — Daily germination rate [file peerj-10-13769-s003.xlsx]

## Sheet: Feuil14
Germination time (Days)	0	1	2	3	4	5	7	9	10
Cumulitive germinated seeds %	0	0	0	0	0	9	35	66	80
1st trial	0	0	0	0	0	2	14	29	34
2end trial	0	0	0	0	0	7	21	37	46
