# Supplementary material for: Growth promotion and mycorrhizal colonization of Argan (Argania spinosa (L.) Skeels) inoculated with the edible desert truffle Tirmania nivea (Desf.) Trappe
Source: PeerJ. 2022 Aug 17;10:e13769. doi: 10.7717/peerj.13769 (PMC9392452; doi:10.7717/peerj.13769)
Supplement: Supplemental Information 4 — Morphological growth parameters (height, leaf number, leaf length, shoot fresh weight “FW”, shoot dry weight “DW” and root fresh weight “FW”), and physiological growth parameters (chlorophyll a content, chlorophyll b content, relative water content, leaf hydration,) of A. spinosa (AS) plants after 15.5 months of inoculation with T. nivea (TN) (Raw Data) [file peerj-10-13769-s004.xlsx]

## Sheet: Feuil1
	Plant height (cm)	Leaf number	Leaf length (cm)	Shoot FW (g)	Shoot DW (g)	Root FW (g)	Relative water content (%)	Leaf hydration (%)	Chlorophyll a (mg/g)	Chlorophyll b (mg/g)
NM plant 1	14.2	18	2.1	0.321	0.225	1.082	78.8525	63.1203	4.51411	5.50167
NM plant 2	19.8	20	1.4	0.715	0.215	1.035	65.9016	49.0977	4.00932	4.66614
NM plant 3	13	33	1.8	0.78	0.202	0.637	66.3636	57.2727	3.30176	3.06582
NM plant 4	17.5	5	1.7	0.486	0.244	0.924	67	55.5263	4.0037	3.7064
NM plant 5	32	10	1.13	1.564	0.577	2.123	63.1818	49.1627	3.99517	4.52019
NM plant 6	11	1	0.6	0.346	0.172	0.474	40	21.0526	3.99945	3.86595
NM plant 7	17.2	40	2.8	0.808	0.473	0.542	65	33.3333	4.15062	4.28618
NM plant 8	18.5	18	2.5	0.305	0.213	0.673	52.5	27.193	3.22621	3.67599
NM plant 9	16.2	14	2.2	0.326	0.184	0.64	46.25	24.1228	3.11071	3.77099
NM plant 10	13.8	8	2.25	0.225	0.173	0.792	55.625	28.7281	3.06	3.4184
Average	17.32	16.7	1.848	0.5876	0.2678	0.8922	60.0675	40.861	3.73711	4.04777
M plant 1	34.5	54	2.7	2.343	0.798	2.103	73.2143	65.2174	4.20906	6.12062
M plant 2	21.5	91	3.5	2.373	0.787	2.4	91.8919	82.8571	3.0829	4.213
M plant 3	30	32	3.5	1.292	0.368	2.156	95.8333	80	4.24372	3.56404
M plant 4	29.7	29	3	1.404	0.504	1.744	95.9184	78.9474	6.36745	7.64095
M plant 5	28.5	24	1.7	0.763	0.311	1.475	77.1429	57.6923	5.8551	6.6947
M plant 6	24.1	30	1.7	0.681	0.299	1.203	64.8837	33.3333	6.1113	7.16785
M plant 7	44	29	2.4	0.93	0.61	0.652	92.4051	51.3889	6.2394	7.40442
M plant 8	36.9	62	3.1	0.964	0.543	1.266	78.7879	31.7647	6.04725	7.04956
M plant 9	21	64	2.2	0.446	0.313	1.625	52.1739	31.5789	5.12817	6.58506
M plant 10	35.7	58	2.9	1.6535	0.6705	1.6845	76.0011	38.4911	4.10554	5.07454
Average	30.59	47.3	2.67	1.28495	0.52035	1.63085	79.8252	55.1271	5.13899	6.15147
